# Supplementary material for: Mouse-adapted SARS-CoV-2 protects animals from lethal SARS-CoV challenge
Source: PLoS Biol. 2021 Nov 4;19(11):e3001284. doi: 10.1371/journal.pbio.3001284 (PMC8594810; doi:10.1371/journal.pbio.3001284)
Supplement: S1 Data — (XLSX) [file pbio.3001284.s006.xlsx]

## Sheet: Sheet1
S1data	Figure 1
1B
	WT	p1	p2	p3	p4	p5	p6	p7	p8	p9	p10	p11	p12	p13	p14	p15	p16	p17	p18	p19	p20
Titer	1	117000	1400000	790000	560000	85000	670000	230000	590000	390000	81000	1700000	2800000	1150000	620000	2850000	390000	270000	310000	520000	205000
1C
	p15																		p10																		CMA3
0	100	100	100	100	100	100	100	100	100	100	100	100	100	100	100	100	100		100	100	100	100	100	100	100	100	100	100	100	100	100	100	100	100	100		100	100	100	100
1	95.3846	91.2844	95.6989	96	95.6284	97.9167	101.064	98.4848	98.9848	99.5074	98.5149	98.9071	98.9474	97.2973	98.0488	99.4975	99.4819		96.4824	100.538	97.3262	95.6044	96.8254	95.3125	94.9749	95.4545	94.9495	96.2162	99.4872	100	99.4924	98.9848	96.9849	98.3957	96.1722		100.474	96.6019	100.503	100.503
2	100	94.4954	98.3871	94	98.3607	96.3542	104.255	98.9899	99.4924	96.5517	93.0693	94.5355	92.6316						97.9899	100	96.7914	93.4066	96.8254	96.875	95.9799	96.5909	96.9697	95.1351	92.3077	96.9072	95.4315		93.9698				94.7867	88.3495	94.4724	91.9598
3	94.8718	95.8716	93.0108	92	92.8962	94.7917	100	96.4646	96.9543										93.4673	101.613	100	92.3077	97.3545	95.3125	95.9799	95.4545	92.4242	92.973									90.5213	85.9223	90.9548	89.4472
4	95.3846	93.1193	96.2366	94	92.8962	95.8333	98.4043	98.4848	97.4619										95.9799	101.075	99.4652	94.5055	96.2963	98.4375	98.4925	96.0227	95.4545	97.2973									90.9953	88.3495	94.4724	92.9648
